# Supplementary material for: Interacting Bioenergetic and Stoichiometric Controls on Microbial Growth
Source: PubMed Central journal article supplement (PMC9152356; doi:10.3389/fmicb.2022.859063), 2022-05-17
Supplement: Data_Sheet_1.pdf [file Data_Sheet_1.pdf]

## Supplementary information

# Interacting bioenergetic and stoichiometric controls on microbial growth

Arjun Chakrawal<sup>1,2\*</sup>, Salvatore Calabrese<sup>3</sup>, Anke M. Herrmann<sup>4</sup>, and Stefano Manzoni<sup>1,2</sup>

<sup>1</sup>Department of Physical Geography, Stockholm University, 10691 Stockholm, Sweden

<sup>2</sup>Bolin Centre for Climate Research, Stockholm University, 10691 Stockholm, Sweden

<sup>3</sup>Department of Biological and Agricultural Engineering, Texas A&M University, 333 Spence St, College Station, TX 77843 USA.

<sup>4</sup>Department of Soil and Environment, Swedish University of Agricultural Sciences, Uppsala, 750 07, Sweden

\* Correspondence:

Arjun Chakrawal

[arjun.chakrawal@natgeo.su.se](mailto:arjun.chakrawal@natgeo.su.se)

## 1 Supplementary Tables

Table S1. Half-reactions of reduction of electron acceptors (EAs), moles of electron received by the EA ( $\gamma_{EA}$ ), and change in Gibbs energy ( $\Delta_{red}G_{EA}$ ) expressed per mol of EA or per mol of electron (LaRowe and Amend, 2015; Dick, 2019).

| Compound                                                | $\gamma_{EA}$ | Half-reaction                                      | $\Delta_{red}G_{EA}$ (kJ/mol EA)                                                 | $\frac{\Delta_{red}G_{EA}}{\gamma_{EA}}$<br>(kJ/mol $e^-$ ) |
|---------------------------------------------------------|---------------|----------------------------------------------------|----------------------------------------------------------------------------------|-------------------------------------------------------------|
| O <sub>2</sub> (oxygen)                                 | 4             | $O_2 + 4e^- + 4H^+ \rightarrow 2H_2O$              | -490.9                                                                           | -122.72                                                     |
| Mn <sup>+4</sup> (pyrolusite)                           | 2             | $MnO_2 + 4H^+ + 2e^- \rightarrow Mn^{2+} + 2H_2O$  | -240                                                                             | -120                                                        |
| Fe <sup>+3</sup> (goethite)                             | 1             | $FeOOH + 3H^+ + e^- \rightarrow Fe^{2+} + 2H_2O$   | -75.6                                                                            | -75.6                                                       |
| Fe <sup>+3</sup> (ferrihydrite)                         | 1             | $FeOOH + 3H^+ + e^- \rightarrow Fe^{2+} + 2H_2O$   | -100.6                                                                           | -100.6                                                      |
| SO <sub>4</sub> <sup>-2</sup> (sulfate)                 | 8             | $SO_4^{2-} + 8e^- + 9H^+ \rightarrow HS^- + 4H_2O$ | -192.3                                                                           | -24.04                                                      |
|                                                         |               |                                                    | $\Delta_{red}G_{EA} = \Delta_{red}G_N$<br>(kJ/mol NO <sub>3</sub> <sup>-</sup> ) |                                                             |
| NO <sub>3</sub> <sup>-</sup> (nitrate, DNRA)            | 8             | $NO_3^- + 8e^- + 10H^+ \rightarrow NH_4^+ + 3H_2O$ | -680                                                                             | -85                                                         |
| NO <sub>3</sub> <sup>-</sup> (nitrate, denitrification) | 8             | $NO_3^- + 5e^- + 6H^+ \rightarrow 0.5 N_2 + 3H_2O$ | -591.5                                                                           | -118.2                                                      |

Table S2. Example of reaction for microbial growth on glucose/oxygen/nitrate and glycine/nitrate/nitrate as organic matter (OM)/electron acceptor (EA)/ inorganic N source, including chemical equations and change in Gibbs energy ( $\Delta G$ ).

| Reaction                    | Chemical equation (Glycine/NO <sub>3</sub> <sup>-</sup> / NO <sub>3</sub> <sup>-</sup> )                                     | $\Delta G$                                                |
|-----------------------------|------------------------------------------------------------------------------------------------------------------------------|-----------------------------------------------------------|
| Catabolism                  | OM oxidation: $CH_{2.5}ON_{0.5} + 2H_2O \rightarrow HCO_3^- + 0.5NH_4^+ + 3.5 H^+ + 3e^-$                                    | 48.9 kJ (C-mol glycine) <sup>-1</sup>                     |
|                             | EA reduction: $NO_3^- + 8e^- + 10H^+ \rightarrow NH_4^+ + 3H_2O$                                                             | -680 kJ (mol NO <sub>3</sub> <sup>-</sup> ) <sup>-1</sup> |
|                             | Overall catabolic reaction: $CH_{2.5}ON_{0.5} + 0.375NO_3^- + 0.875H_2O + 0.25 H^+ \rightarrow HCO_3^- + 0.875 NH_4^+$       | -223 kJ (C-mol glycine) <sup>-1</sup>                     |
| Anabolism                   | $1.4 CH_{2.5}ON_{0.5} + 0.1H^+ + 0.3H_2O \rightarrow CH_{1.8}O_{0.5}N_{0.2} + 0.4 HCO_3^- + 0.5NH_4^+$                       | -8.95 kJ (C-mol biomass) <sup>-1</sup>                    |
| Overall metabolic reaction* | $CH_{2.5}ON_{0.5} + 0.2175 NO_3^- + 0.6H_2O + 0.175H^+ \rightarrow 0.3 CH_{1.8}O_{0.5}N_{0.2} + 0.6575 NH_4^+ + 0.7 HCO_3^-$ | -137 kJ (C-mol glycine) <sup>-1</sup>                     |
|                             | $3.33CH_{2.5}ON_{0.5} + 0.725 NO_3^- + 2H_2O + 0.5833H^+ \rightarrow CH_{1.8}O_{0.5}N_{0.2} + 2.2NH_4^+ + 2.33HCO_3^-$       | -465 kJ (C-mol biomass) <sup>-1</sup>                     |

| Reaction                           | Chemical equation (Glucose/O <sub>2</sub> / NO <sub>3</sub> <sup>-</sup> )                                                                                                                                                      | ΔG                                                        |
|------------------------------------|---------------------------------------------------------------------------------------------------------------------------------------------------------------------------------------------------------------------------------|-----------------------------------------------------------|
| <b>Catabolism</b>                  | OM oxidation: CH <sub>2</sub> O + 2H <sub>2</sub> O → HCO <sub>3</sub> <sup>-</sup> + 5H <sup>+</sup> + 4e <sup>-</sup>                                                                                                         | 60.3 kJ (C-mol glucose) <sup>-1</sup>                     |
|                                    | EA reduction: O <sub>2</sub> + 4e <sup>-</sup> + 4H <sup>+</sup> → 2H <sub>2</sub> O                                                                                                                                            | -490.9 kJ (mol O <sub>2</sub> ) <sup>-1</sup>             |
|                                    | N source reduction: NO <sub>3</sub> <sup>-</sup> + 8e <sup>-</sup> + 10H <sup>+</sup> → NH <sub>4</sub> <sup>+</sup> + 3H <sub>2</sub> O                                                                                        | -680 kJ (mol NO <sub>3</sub> <sup>-</sup> ) <sup>-1</sup> |
|                                    | Overall catabolic reaction: CH <sub>2</sub> O + 0.185NO <sub>3</sub> <sup>-</sup> + 0.63O <sub>2</sub> + 0.185H <sub>2</sub> O → 0.63 H <sup>+</sup> + HCO <sub>3</sub> <sup>-</sup> + 0.185 NH <sub>4</sub> <sup>+</sup>       | -375 kJ (C-mol glucose) <sup>-1</sup>                     |
| <b>Anabolism</b>                   | 1.05 CH <sub>2</sub> O + 0.2 NH <sub>4</sub> <sup>+</sup> → CH <sub>1.8</sub> O <sub>0.5</sub> N <sub>0.2</sub> + 0.05 HCO <sub>3</sub> <sup>-</sup> + 0.25 H <sup>+</sup> + 0.4H <sub>2</sub> O                                | -8.95 kJ (C-mol biomass) <sup>-1</sup>                    |
| <b>Overall metabolic reaction*</b> | CH <sub>2</sub> O + 0.094 NO <sub>3</sub> <sup>-</sup> + 0.32O <sub>2</sub><br>→ 0.47 CH <sub>1.8</sub> O <sub>0.5</sub> N <sub>0.2</sub> + 0.53 HCO <sub>3</sub> <sup>-</sup> + 0.436H <sup>+</sup><br>+ 0.097H <sub>2</sub> O | -192 kJ (C-mol glucose) <sup>-1</sup>                     |
|                                    | 2.12CH <sub>2</sub> O + 0.2 NO <sub>3</sub> <sup>-</sup> + 0.68O <sub>2</sub> → CH <sub>1.8</sub> O <sub>0.5</sub> N <sub>0.2</sub> + 1.12HCO <sub>3</sub> <sup>-</sup> + 0.927H <sup>+</sup> + 0.2 H <sub>2</sub> O            | -408.5 kJ (C-mol biomass) <sup>-1</sup>                   |

\* To obtain the overall metabolic reaction for glycine and glucose, the growth efficiencies ( $e_{glycine} = 0.3$  and  $e_{glucose} = 0.47$ ) are estimated from Eq. (34) and then used Eq.(22).

Table S3. Values of Gibbs energy of formation for selected compounds at pH 7 from Kleerebezem and Van Loosdrecht (2010).

| Compound       | Gibbs energy of formation $\Delta_f G^0$ (kJ/mol) |
|----------------|---------------------------------------------------|
| Water          | -237.2                                            |
| Bicarbonate    | -586.85                                           |
| Glucose        | -917.22                                           |
| H <sup>+</sup> | 0                                                 |
| Oxygen         | 16.4                                              |
| Nitrate        | -111                                              |
| Ammonium       | -79.5                                             |

## 2 Supplementary Figures

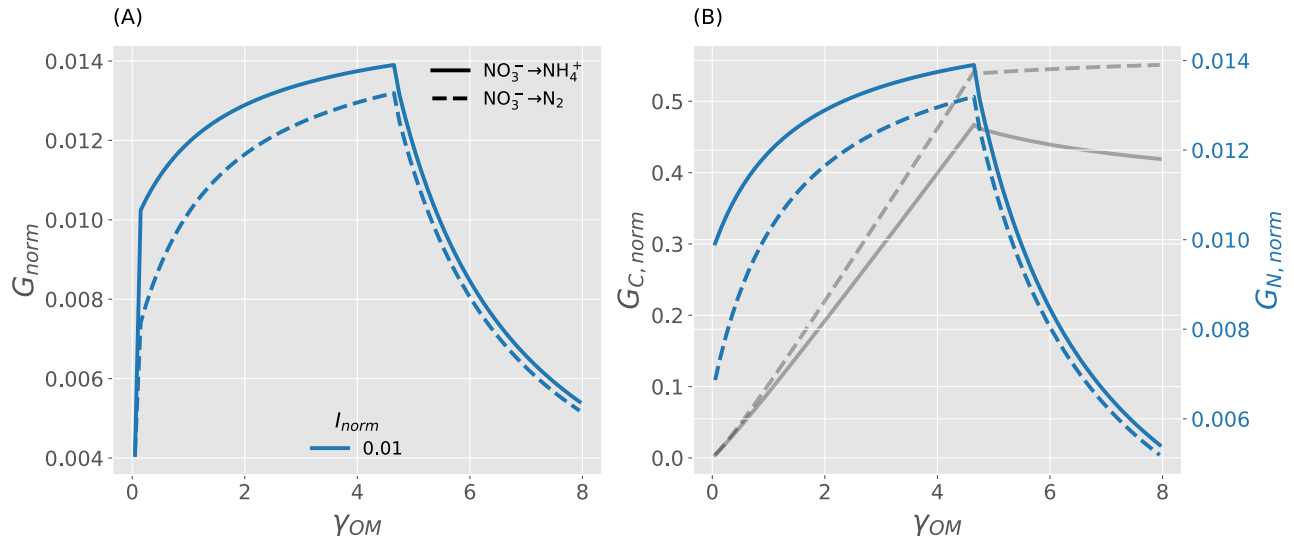

Figure S1. Enlarged view of growth rates in Figure 4 for  $I_{norm} = 0.01$ . (A) normalized microbial growth rate ( $G_{norm}$ ) as a function of degree of reduction of the OM, when the OM is catabolized via denitrification (dashed curves) or DNRA pathway (solid curves). (B) normalized microbial growth rate under C ( $G_{C, norm}$ ; Eq. (3)) and N ( $G_{N, norm}$ ; Eq. (4)) limited conditions.

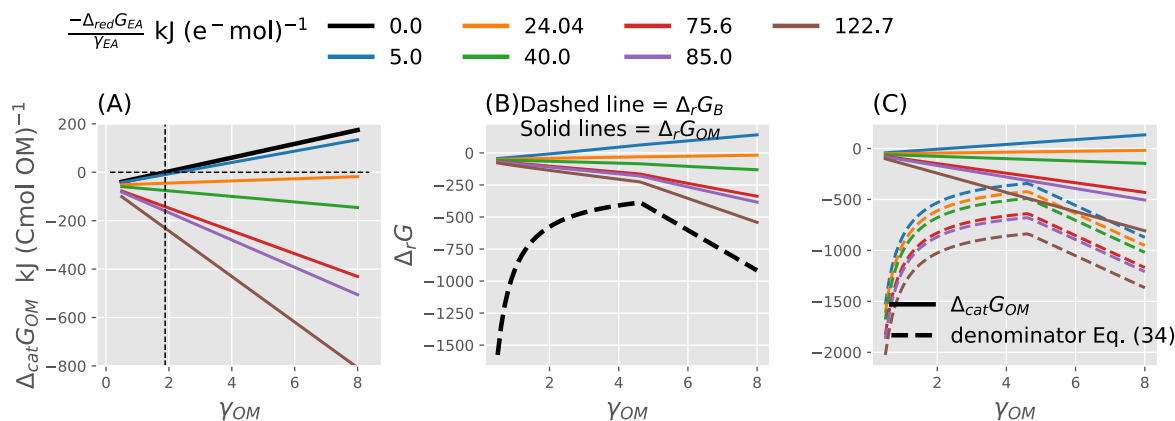

Figure S2. (A) Change in Gibbs energy dissipated from the catabolic reaction ( $\Delta_{cat}G_{OM}$ ; kJ (C-mol OM)<sup>-1</sup>) as a function of the degree of reduction of OM ( $\gamma_{OM}$ ), for different values of change in Gibbs energy of the EA reduction reaction ( $\Delta_{red}G_{EA}/\gamma_{EA}$ ; kJ per mol of electrons accepted by 1 mol of EA), shown as curves of different colors. The black line indicates  $\Delta_{cat}G_{OM} = \Delta_{ox}G_{OM}$ , when  $\Delta_{red}G_{EA} = 0$ . The thin dashed lines indicate  $\Delta_{cat}G_{OM} = 0$  and  $\gamma_{ED} = 1.8$ , above which  $\Delta_{cat}G_{OM} > 0$ . (B) Change in Gibbs energy dissipated from overall reaction  $\Delta_r G_{OM}$  (solid lines; kJ (C-mol OM)<sup>-1</sup>) and  $\Delta_r G_B$  (dashed line; kJ (C-mol B)<sup>-1</sup>) as a function of  $\gamma_{ED}$ . (C) Numerator ( $\Delta_{cat}G_{ED}$ ) and denominator of Eq. (34) ( $\Delta_r G_B - \Delta_{ana}G_B + \gamma_B/\gamma_{OM} \Delta_{cat}G_{OM}$ ) as a function of  $\gamma_{OM}$ ; these two terms determine trends in  $e$  with  $\gamma_{OM}$ .

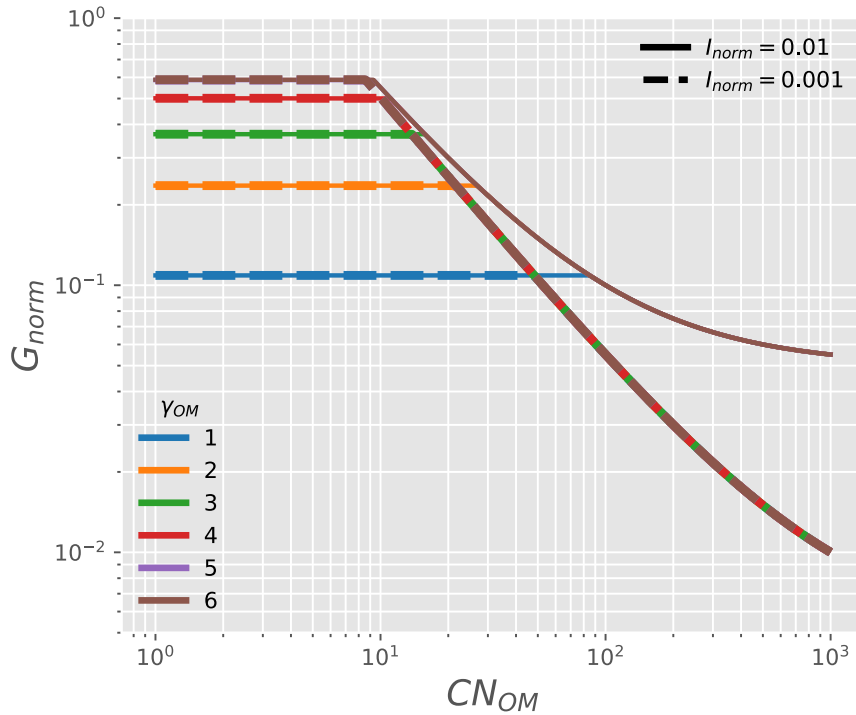

Figure S3. Variation of normalized microbial growth rate ( $G_{norm}$ ) when overflow respiration is assumed instead of decreased organic matter(OM) uptake under N limitation (see Figure 5 for the latter scenario). Variations in  $G_{norm}$  are assessed along a gradient of OM C:N ratio ( $CN_{OM}$ ) under aerobic conditions, and with varying degree of reduction of OM ( $\gamma_{OM}$ ; curves with different colors), and different inorganic N availability ( $I_{norm}$ , solid vs. dashed curves).

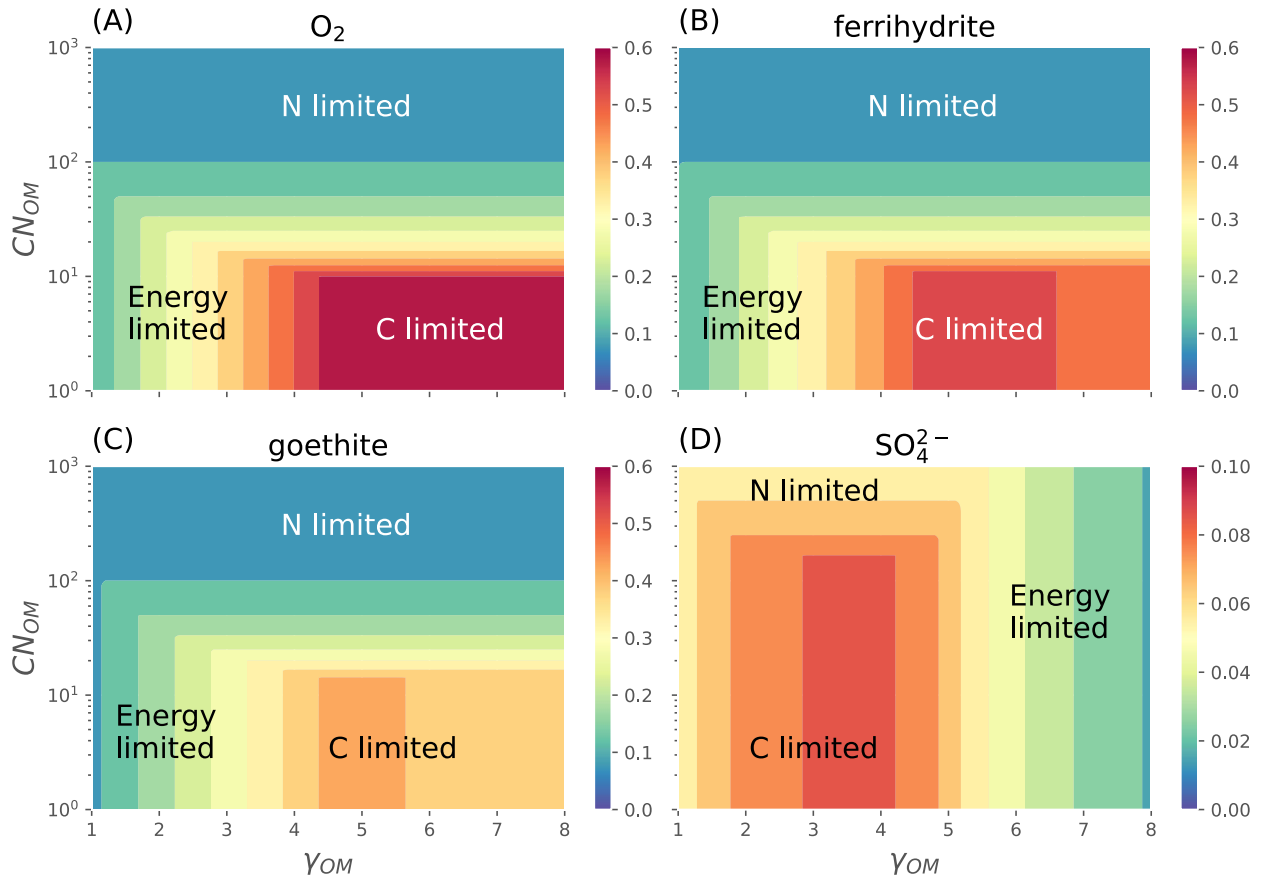

Figure S4. Variation of normalized microbial growth rate ( $G_{norm}$ ; contours curves with different colors) when overflow respiration is assumed instead of decreased organic matter(OM) uptake under N limitation (see Figure 6 for the latter scenario). Variations in  $G_{norm}$  are assessed along a gradient of OM C:N ratio ( $CN_{OM}$ ) and degree of reduction ( $\gamma_{OM}$ ), for different electron acceptors. A constant value of  $I_{norm} = 0.01$  was assumed.

### 3 Code availability

A python script used to generate all figures is provided in this Github repository <https://github.com/ArjunChakrawal/Stoichiometry-and-Thermodynamics.git>.
